# Supplementary material for: Potential Prognostic Biomarkers of NIMA (Never in Mitosis, Gene A)-Related Kinase (NEK) Family Members in Breast Cancer
Source: MDPI journal article supplement (doi:10.3390/jpm11111089), 2021-10-26
Supplement: s1 [file s1]

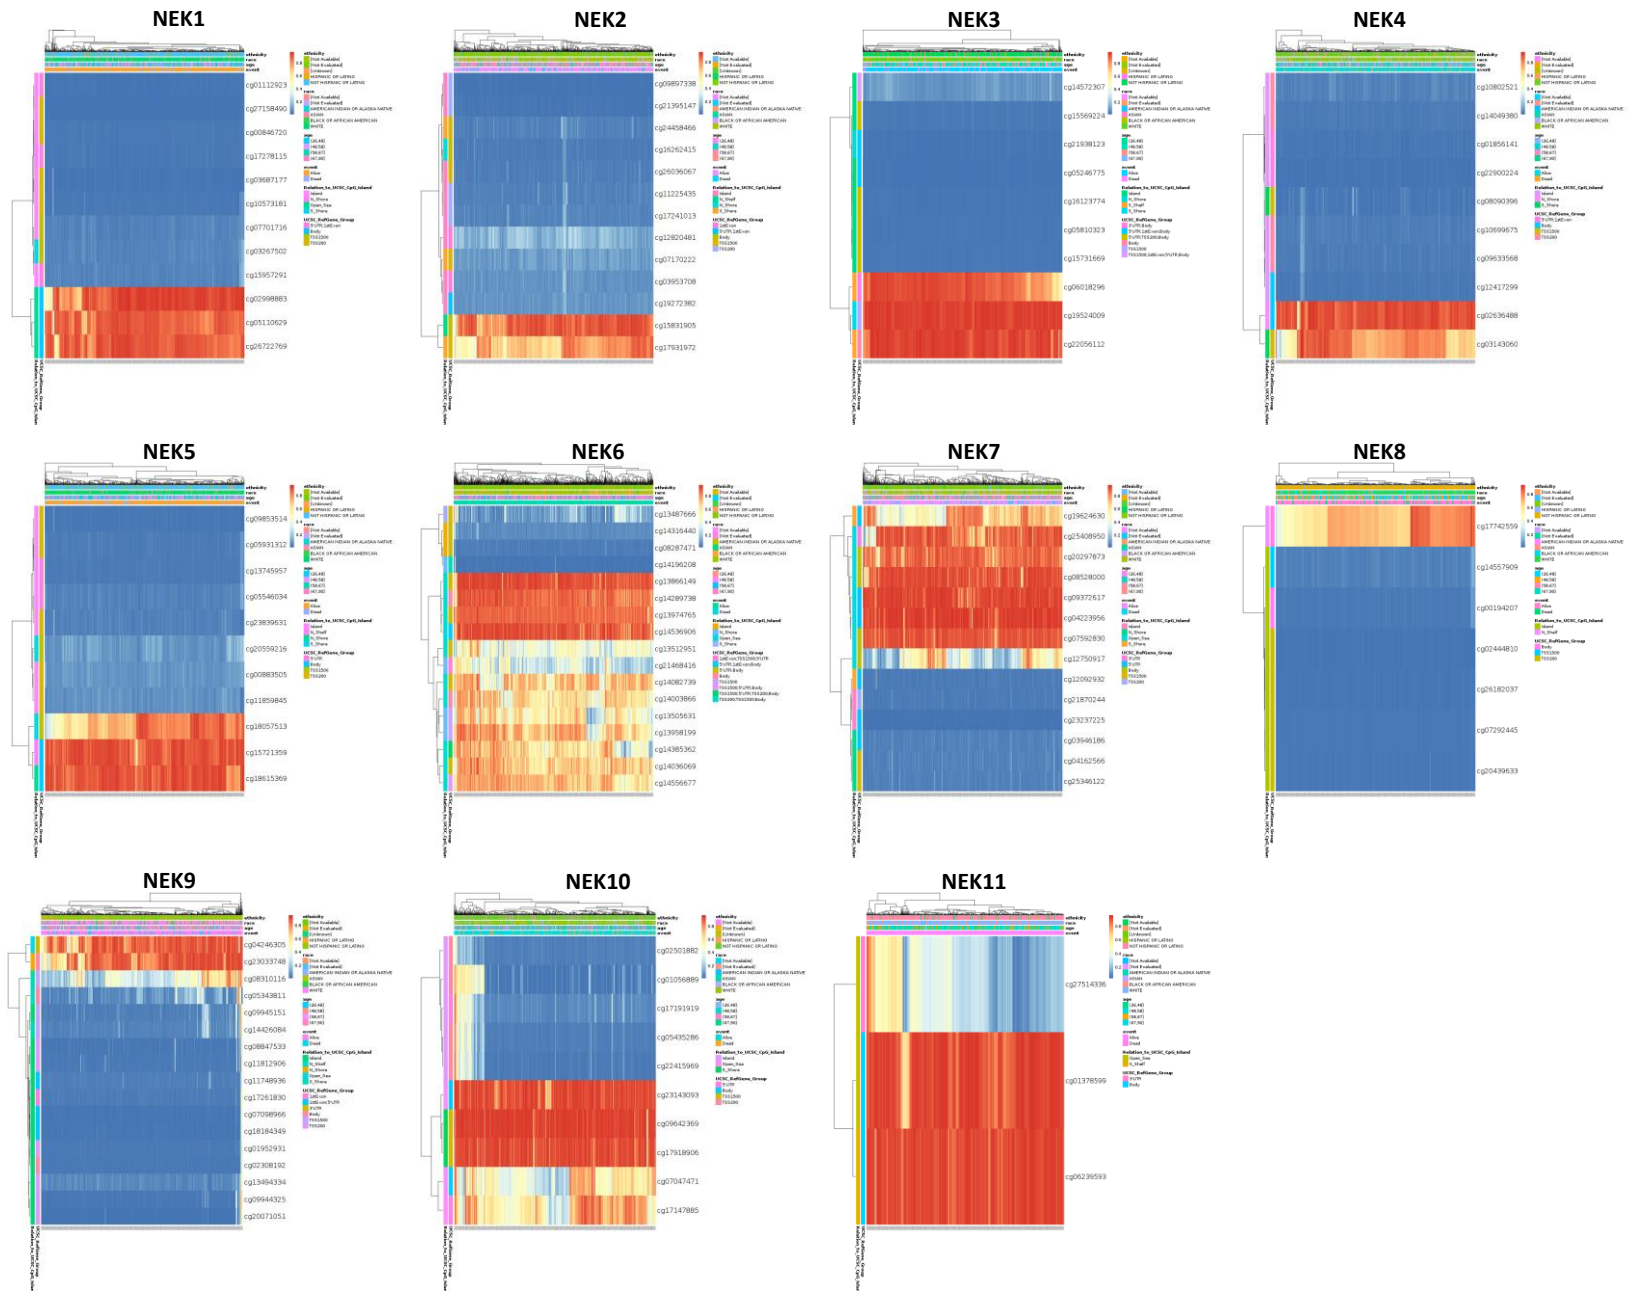

**Figure S1. Heatmap of DNA methylation expression levels of the NEK gene family in breast cancer by MethSurv platform.** cg02998883, cg05110629, cg26722769 of NEK1; cg15831905, cg17931972 of NEK2; cg19524009, cg22056112 of NEK3; cg02636488 of NEK4; cg15721359, cg18615369 of NEK5; cg14536906, cg13866149, cg13974765, cg14289738 of NEK6; cg04223956, cg09372617 of NEK7; cg17742559 of NEK8; cg04246305 of NEK9; cg09642369, cg17918906 of NEK10; cg01378599, cg06239593 of NEK11 displays the highest level of DNA methylation in breast cancer.

**Table S1: Prognostic Value of Single CpG of the NEK gene family in breast cancer by MethSurv platform.** The threshold of significance was LR Test p-value <0.05. A significant expression pattern was found in NEK2/6 between low and high risk groups for breast cancer.

| Gene-CpG                                    | HR    | LR Test p-value |
|---------------------------------------------|-------|-----------------|
| NEK1-Body-Open_Sea-cg02998883               | 1.216 | 0.33            |
| NEK1-Body-Open_Sea-cg05110629               | 0.816 | 0.3             |
| NEK1-Body-Open_Sea-cg26722769               | 0.751 | 0.16            |
| NEK2-Body-N_Shelf-cg15831905                | 0.971 | 0.88            |
| NEK2-TSS1500-S_Shore-cg17931972             | 0.558 | 0.0036*         |
| NEK3-TSS1500-S_Shore-cg19524009             | 1.219 | 0.32            |
| NEK3-Body-S_Shelf-cg22056112                | 0.77  | 0.19            |
| NEK4-Body-N_Shore-cg02636488                | 1.073 | 0.72            |
| NEK5-Body-N_Shelf-cg15721359                | 0.847 | 0.4             |
| NEK5-Body-N_Shore-cg18615369                | 0.845 | 0.4             |
| NEK6-5'UTR;1stExon;Body-Open_Sea-cg14536906 | 0.879 | 0.51            |
| NEK6-5'UTR;Body-Open_Sea-cg13866149         | 0.963 | 0.85            |
| NEK6-5'UTR;Body-Open_Sea-cg13974765         | 0.695 | 0.068           |
| NEK6-Body-Open_Sea-cg14289738               | 0.56  | 0.0042*         |
| NEK7-5'UTR-Open_Sea-cg04223956              | 0.976 | 0.9             |
| NEK7-5'UTR-Open_Sea-cg09372617              | 1.15  | 0.48            |
| NEK8-Body-N_Shelf-cg17742559                | 0.858 | 0.44            |
| NEK9-3'UTR-Open_Sea-cg04246305              | 0.699 | 0.07            |
| NEK10-TSS1500-S_Shore-cg09642369            | 0.749 | 0.14            |
| NEK10-TSS1500-S_Shore-cg17918906            | 0.971 | 0.88            |
| NEK11-Body-Open_Sea-cg01378599              | 1.056 | 0.78            |
| NEK11-Body-S_Shelf-cg06239593               | 0.799 | 0.26            |

Table S2: Hallmark signaling pathway analysis of NEK2 in BRCA (GSEA Analysis, Supplementary table S2, Figure 7).

| Pathway                                  | pval     | padj     | log2err  | ES       | NES      |
|------------------------------------------|----------|----------|----------|----------|----------|
| HALLMARK_E2F_TARGETS                     | 1.00E-10 | 8.33E-10 |          | 0.71994  | 3.11495  |
| HALLMARK_G2M_CHECKPOINT                  | 1.00E-10 | 8.33E-10 |          | 0.683988 | 2.959398 |
| HALLMARK_MYC_TARGETS_V1                  | 1.00E-10 | 8.33E-10 |          | 0.585011 | 2.531697 |
| HALLMARK_MYC_TARGETS_V2                  | 1.90E-10 | 1.35E-09 | 0.826657 | 0.664633 | 2.415173 |
| HALLMARK_MTORC1_SIGNALING                | 1.00E-10 | 8.33E-10 |          | 0.481279 | 2.082339 |
| HALLMARK_DNA_REPAIR                      | 2.19E-07 | 1.09E-06 | 0.690132 | 0.46777  | 1.943888 |
| HALLMARK_UNFOLDED_PROTEIN_RESPONSE       | 2.40E-06 | 9.22E-06 | 0.627257 | 0.473169 | 1.898675 |
| HALLMARK_GLYCOLYSIS                      | 1.22E-06 | 5.09E-06 | 0.643552 | 0.416807 | 1.803391 |
| HALLMARK_INTERFERON_ALPHA_RESPONSE       | 0.000154 | 0.000427 | 0.518848 | 0.455404 | 1.783309 |
| HALLMARK_MITOTIC_SPINDLE                 | 2.20E-05 | 6.87E-05 | 0.57561  | 0.397629 | 1.720994 |
| HALLMARK_SPERMATOGENESIS                 | 0.000511 | 0.001253 | 0.477271 | 0.398886 | 1.639428 |
| HALLMARK_ESTROGEN_RESPONSE_LATE          | 0.000275 | 0.000725 | 0.498493 | 0.367052 | 1.588115 |
| HALLMARK_PI3K_AKT_MTOR_SIGNALING         | 0.021276 | 0.036682 | 0.352488 | 0.358774 | 1.427884 |
| HALLMARK_INTERFERON_GAMMA_RESPONSE       | 0.008478 | 0.016956 | 0.38073  | 0.324046 | 1.402341 |
| HALLMARK_ESTROGEN_RESPONSE_EARLY         | 0.016549 | 0.030646 | 0.352488 | 0.320301 | 1.386305 |
| HALLMARK_UV_RESPONSE_UP                  | 0.020007 | 0.035726 | 0.352488 | 0.327529 | 1.369654 |
| HALLMARK_ALLOGRAFT_REJECTION             | 0.110682 | 0.172941 | 0.149208 | 0.275883 | 1.193914 |
| HALLMARK_OXIDATIVE_PHOSPHORYLATION       | 0.240669 | 0.325229 | 0.095288 | 0.256042 | 1.10805  |
| HALLMARK_PANCREAS_BETA_CELLS             | 0.50234  | 0.558156 | 0.066284 | 0.290154 | 0.976768 |
| HALLMARK_REACTIVE_OXYGEN_SPECIES_PATHWAY | 0.490798 | 0.557724 | 0.066589 | 0.279271 | 0.97531  |
| HALLMARK_PROTEIN_SECRETION               | 0.678273 | 0.721567 | 0.046882 | 0.228996 | 0.895558 |
| HALLMARK_APICAL_SURFACE                  | 0.806854 | 0.82332  | 0.044064 | 0.235104 | 0.801411 |
| HALLMARK_KRAS_SIGNALING_DN               | 0.962773 | 0.962773 | 0.026395 | 0.177094 | 0.766229 |
| HALLMARK_NOTCH_SIGNALING                 | 0.634921 | 0.690131 | 0.081303 | -0.254   | -0.89576 |
| HALLMARK_INFLAMMATORY_RESPONSE           | 0.748879 | 0.780082 | 0.10208  | -0.18367 | -0.90667 |
| HALLMARK_ANGIOGENESIS                    | 0.43454  | 0.50528  | 0.106323 | -0.27918 | -1.00469 |
| HALLMARK_HEDGEHOG_SIGNALING              | 0.383152 | 0.456134 | 0.112843 | -0.28342 | -1.01703 |
| HALLMARK_P53_PATHWAY                     | 0.327273 | 0.409091 | 0.164406 | -0.21337 | -1.05046 |

|                                            |          |          |          |          |          |
|--------------------------------------------|----------|----------|----------|----------|----------|
| HALLMARK_IL6_JAK_STAT3_SIGNALING           | 0.347079 | 0.423267 | 0.13649  | -0.24641 | -1.06307 |
| HALLMARK_PEROXISOME                        | 0.279851 | 0.358783 | 0.160801 | -0.24548 | -1.09361 |
| HALLMARK_CHOLESTEROL_HOMEOSTASIS           | 0.270548 | 0.355984 | 0.156312 | -0.26434 | -1.10124 |
| HALLMARK_ANDROGEN_RESPONSE                 | 0.197183 | 0.273865 | 0.188204 | -0.25668 | -1.14047 |
| HALLMARK_COMPLEMENT                        | 0.15521  | 0.221729 | 0.249247 | -0.23571 | -1.16046 |
| HALLMARK_APOPTOSIS                         | 0.142276 | 0.20923  | 0.249247 | -0.24794 | -1.1832  |
| HALLMARK_EPITHELIAL_MESENCHYMAL_TRANSITION | 0.061505 | 0.099202 | 0.321776 | -0.24459 | -1.21122 |
| HALLMARK_COAGULATION                       | 0.040394 | 0.067324 | 0.321776 | -0.2757  | -1.28536 |
| HALLMARK_WNT_BETA_CATENIN_SIGNALING        | 0.119241 | 0.180668 | 0.213928 | -0.34332 | -1.2893  |
| HALLMARK_IL2_STAT5_SIGNALING               | 0.008083 | 0.016839 | 0.38073  | -0.2864  | -1.41003 |
| HALLMARK_APICAL_JUNCTION                   | 0.002407 | 0.005233 | 0.431708 | -0.29583 | -1.45268 |
| HALLMARK_HEME_METABOLISM                   | 0.001156 | 0.002627 | 0.45506  | -0.30426 | -1.4941  |
| HALLMARK_TGF_BETA_SIGNALING                | 0.008964 | 0.017238 | 0.38073  | -0.39871 | -1.5794  |
| HALLMARK_XENOBIOTIC_METABOLISM             | 5.68E-05 | 0.000167 | 0.557332 | -0.33553 | -1.64767 |
| HALLMARK_BILE_ACID_METABOLISM              | 0.000526 | 0.001253 | 0.477271 | -0.37067 | -1.65469 |
| HALLMARK_KRAS_SIGNALING_UP                 | 4.30E-06 | 1.43E-05 | 0.610527 | -0.357   | -1.76789 |
| HALLMARK_HYPOXIA                           | 2.81E-06 | 1.00E-05 | 0.627257 | -0.36633 | -1.80838 |
| HALLMARK_FATTY_ACID_METABOLISM             | 9.78E-07 | 4.45E-06 | 0.643552 | -0.41076 | -1.96252 |
| HALLMARK_TNFA_SIGNALING_VIA_NFKB           | 5.89E-09 | 3.27E-08 | 0.761461 | -0.4113  | -2.03038 |
| HALLMARK_MYOGENESIS                        | 3.39E-10 | 2.12E-09 | 0.814036 | -0.43359 | -2.13463 |
| HALLMARK_UV_RESPONSE_DN                    | 1.00E-10 | 8.33E-10 |          | -0.51101 | -2.39865 |
| HALLMARK_ADIPOGENESIS                      | 1.00E-10 | 8.33E-10 |          | -0.53743 | -2.66138 |

**Table S3: Pathway analysis of genes coexpressed NEK2 from public breast cancer databases using the MetaCore database (with p – value <0.05 set as the cutoff value) (Supplementary Table S3, Figure 8).**

| #  | Maps                                                                | pValue    | Network Objects from Active Data                                                                                                                                                |
|----|---------------------------------------------------------------------|-----------|---------------------------------------------------------------------------------------------------------------------------------------------------------------------------------|
| 1  | Cell cycle_The metaphase checkpoint                                 | 6.790E-34 | INCENP, Aurora-B, BUB1, HEC, SPBC25, CDCA1, CENP-A, CDC20, HZWint-1, Rod, CENP-F, SPBC24, DSN1, Zwilch, MAD2a, Survivin, CENP-H, CENP-E, AF15q14, Aurora-A, PLK1, BUBR1         |
| 2  | Cell cycle_Role of APC in cell cycle regulation                     | 3.599E-31 | Aurora-B, BUB1, CDC25A, CDC18L (CDC6), CDC20, SKP2, Cyclin B, Tome-1, Geminin, MAD2a, Emi1, Securin, ORC1L, Cyclin A, CDK1 (p34), Aurora-A, PLK1, CDK2, CKS1, BUBR1             |
| 3  | Cell cycle_Chromosome condensation in prometaphase                  | 2.439E-27 | INCENP, Aurora-B, BRRN1, CAP-H/H2, CAP-G, CAP-E, Cyclin B, Condensin, CAP-C, TOP2, Cyclin A, CNAP1, CAP-G/G2, CDK1 (p34), Aurora-A, CAP-D2/D3                                   |
| 4  | Cell cycle_Start of DNA replication in early S phase                | 6.421E-23 | Cdt1, CDC18L (CDC6), MCM10, ORC6L, Geminin, ASK (Dbf4), MCM4/6/7 complex, MCM4, CDC7, MCM3, MCM2, ORC1L, Cyclin E, CDK2, E2F1, CDC45L                                           |
| 5  | Cell cycle_Spindle assembly and chromosome separation               | 1.233E-22 | KNSL1, Aurora-B, HEC, Importin (karyopherin)-alpha, CDC20, TPX2, Tubulin alpha, Cyclin B, CSE1L, MAD2a, Separase, Securin, Ran, CDK1 (p34), Aurora-A, Tubulin (in microtubules) |
| 6  | DNA damage_ATM/ATR regulation of G2/M checkpoint: nuclear signaling | 2.856E-18 | CDC25C, GTSE1, WDHD1, CDC18L (CDC6), Cyclin B1, Cyclin B, Chk2, Cyclin B2, TTK, Cyclin A, CDK1 (p34), Claspin, Chk1, PLK1, CDK2                                                 |
| 7  | Cell cycle_Role of SCF complex in cell cycle regulation             | 3.422E-16 | Cdt1, CDC25A, SKP2, Emi1, Cyclin E, CDK1 (p34), Skp2/TrCP/FBXW, Chk1, PLK1, CDK2, CKS1, E2F1                                                                                    |
| 8  | Abnormalities in cell cycle in SCLC                                 | 3.422E-16 | Aurora-B, PCNA, Cyclin B1, SKP2, E2F2, Cyclin A, Cyclin E, CDK1 (p34), Cyclin E2, CDK2, CKS1, E2F1                                                                              |
| 9  | Cell cycle_Cell cycle (generic schema)                              | 1.878E-14 | CDC25C, CDC25A, Cyclin B, E2F2, p107, Cyclin A, Cyclin E, CDK1 (p34), CDK2, E2F1                                                                                                |
| 10 | DNA damage_G2 checkpoint in response to DNA mismatches              | 3.081E-14 | CDC25C, EXO1, TOPBP1, PCNA, MutSalp complex, MSH2, Chk2, MSH6, CDK1 (p34), Claspin, Chk1                                                                                        |
| 11 | Cell cycle_Role of Nek in cell cycle regulation                     | 3.060E-12 | HEC, Tubulin beta, Cyclin B1, TPX2, Tubulin alpha, MAD2a, Ran, CDK1 (p34), Aurora-A, Tubulin (in microtubules)                                                                  |

|    |                                                                         |           |                                                                                          |
|----|-------------------------------------------------------------------------|-----------|------------------------------------------------------------------------------------------|
| 12 | Cell cycle_Initiation of mitosis                                        | 1.347E-11 | KNSL1, CDC25C, Lamin B, Cyclin B1, Cyclin B2, FOXM1, Kinase MYT1, CDK1 (p34), PLK1       |
| 13 | DNA damage_ATM/ATR regulation of G2/M checkpoint: cytoplasmic signaling | 2.153E-11 | CDC25C, Aurora-B, UBE2C, CDC25A, Cyclin B1, BORA, Chk2, CDK1 (p34), Chk1, Aurora-A, PLK1 |
| 14 | Cell cycle_ESR1 regulation of G1/S transition                           | 2.770E-10 | Cyclin A2, CDC25A, SKP2, Cyclin A, Cyclin E, Skp2/TrCP/FBXW, CDK2, CKS1, E2F1            |
| 15 | Cell cycle_Transition and termination of DNA replication                | 5.710E-10 | TOP2 alpha, PCNA, MCM2, TOP2, FEN1, Cyclin A, CDK1 (p34), CDK2                           |
| 16 | Cell cycle_Sister chromatid cohesion                                    | 7.790E-09 | PCNA, Cyclin B, DCC1, RFC3, Separase, Securin, CDK1 (p34)                                |
| 17 | Cell cycle_Nucleocytoplasmic transport of CDK/Cyclins                   | 8.763E-09 | Importin (karyopherin)-alpha, Cyclin B1, Cyclin A, Cyclin E, CDK1 (p34), CDK2            |
| 18 | Reproduction_Progesterone-mediated oocyte maturation                    | 2.429E-08 | CDC25C, BUB1, Cyclin B1, CDC20, Kinase MYT1, CDK1 (p34), Aurora-A, PLK1                  |
| 19 | DNA damage_Role of Brca1 and Brca2 in DNA repair                        | 6.018E-08 | PCNA, FANCD2, BRIP1, MSH2, Chk2, Rad51, MSH6                                             |
| 20 | Nicotine / nAChR alpha-3/nAChR beta-2 signaling in NSCLC                | 5.946E-07 | CDC25A, CDC18L (CDC6), E2F2, TYSY, Survivin, E2F1                                        |
| 21 | Apoptosis and survival_DNA-damage-induced apoptosis                     | 7.219E-07 | BLM, FANCD2, Chk2, Chk1, E2F1                                                            |
| 22 | Cell cycle_Regulation of G1/S transition (part 2)                       | 9.534E-07 | Cyclin A2, p107, Cyclin A, Cyclin E, CDK2, E2F1                                          |
| 23 | Mitogenic action of Estradiol / ESR1 (nuclear) in breast cancer         | 9.534E-07 | SGOL2, CDC25A, Cyclin E, Cyclin E2, CDK2, E2F1                                           |
| 24 | DNA damage_ATM/ATR regulation of G1/S checkpoint                        | 9.805E-07 | PCNA, CDC25A, Chk2, Cyclin A, Cyclin E, Chk1, CDK2                                       |
| 25 | DNA damage_Mismatch repair                                              | 2.202E-06 | EXO1, WDHD1, PCNA, MutSalpha complex, MSH2, MSH6                                         |
| 26 | Immune response_IFN-alpha/beta signaling via PI3K and NF-kB pathways    | 2.249E-06 | PCNA, b-Myb, CDC25A, p107, Cyclin A, Cyclin E, CDK1 (p34), CDK2, E2F1                    |

|    |                                                                                        |           |                                                                                           |
|----|----------------------------------------------------------------------------------------|-----------|-------------------------------------------------------------------------------------------|
| 27 | Higher ESR1 / ESR2 ratio in breast cancer                                              | 4.544E-06 | Cyclin A2, CDC25A, Cyclin B1, SKP2, FOXM1, Cyclin E                                       |
| 28 | HCV-dependent transcription regulation leading to HCC                                  | 4.608E-06 | SKP2, HSP70, Cyclin E, CDK2, E2F1                                                         |
| 29 | IL-6 signaling in colorectal cancer                                                    | 5.369E-06 | Cyclin B1, HSP70, Cyclin B, Survivin, Cyclin E, CDK1 (p34)                                |
| 30 | Cell cycle_Role of 14-3-3 proteins in cell cycle regulation                            | 5.904E-06 | CDC25C, CDC25A, Chk2, CDK1 (p34), Chk1                                                    |
| 31 | Microsatellite instability in gastric cancer                                           | 5.904E-06 | EXO1, PCNA, MutSalph complex, MSH2, MSH6                                                  |
| 32 | Cell cycle_Regulation of G1/S transition (part 1)                                      | 6.311E-06 | CDC25A, Chk2, Cyclin A, Cyclin E, Skp2/TrCP/FBXW, CDK2                                    |
| 33 | Inhibition of remyelination in multiple sclerosis: regulation of cytoskeleton proteins | 1.518E-05 | chTOG, Tubulin beta, Tubulin alpha, Stathmin, Tubulin beta 4, Tubulin (in microtubules)   |
| 34 | DNA damage_Brca1 as a transcription regulator                                          | 2.951E-05 | PCNA, Cyclin B1, MSH2, Chk2, E2F1                                                         |
| 35 | Transcription_Ligand-dependent activation of the ESR1/SP pathway                       | 2.951E-05 | CDC25A, TYSY, Cyclin E, Cyclin E2, E2F1                                                   |
| 36 | dCTP/dUTP metabolism                                                                   | 3.381E-05 | Small RR subunit, RRM1, Ribonucleotide reductase, RRM2, DNA polymerase theta, POLE2, '... |
| 37 | Microsatellite instability in colorectal cancer                                        | 5.538E-05 | EXO1, PCNA, MutSalph complex, MSH2, MSH6                                                  |
| 38 | Rb proteins signaling in multiple myeloma                                              | 5.919E-05 | p107, Cyclin E, CDK2, E2F1                                                                |
| 39 | Mechanisms of CAM-DR in multiple myeloma                                               | 6.397E-05 | TOP2 alpha, HSP70, Cyclin A, Cyclin E, CDK2                                               |
| 40 | Epigenetic alterations in ovarian cancer                                               | 6.580E-05 | DNMT3B, Aurora-B, CDC20, SKP2, PARP-1, Aurora-A, EZH2                                     |

|    |                                                                                                  |           |                                                                    |
|----|--------------------------------------------------------------------------------------------------|-----------|--------------------------------------------------------------------|
| 41 | Brca1 and Brca2 in breast cancer                                                                 | 7.426E-05 | BRIP1, MSH2, Rad51, Chk1                                           |
| 42 | Cell cycle progression in Prostate Cancer                                                        | 1.090E-04 | CDC25A, Cyclin B, CDK1 (p34), CDK2, E2F1                           |
| 43 | Immune response_IL-4-induced regulators of cell growth, survival, differentiation and metabolism | 1.102E-04 | CDC25A, MCM6, MCM4, Cyclin A, Cyclin E, CDK2                       |
| 44 | Transcription_Role of heterochromatin protein 1 (HP1) family in transcriptional silencing        | 1.234E-04 | Cyclin A2, CDC25A, Cyclin E, CDK1 (p34), E2F1                      |
| 45 | Proteolysis_Role of Parkin in the Ubiquitin-Proteasomal Pathway                                  | 1.940E-04 | Tubulin beta, HSP70, Tubulin alpha, Cyclin E                       |
| 46 | DNA damage_Nucleotide excision repair                                                            | 2.168E-04 | Histone H2A, DNA polymerase kappa, PCNA, PARP-1, DTL (hCdt2), EZH2 |
| 47 | The role of aberrations in CDKN2 locus and CDK4 in familial melanoma                             | 3.599E-04 | b-Myb, E2F2, p107, E2F1                                            |
| 48 | Notch signaling in breast cancer                                                                 | 4.732E-04 | Cyclin B1, HURP, Survivin, Cyclin A, CDK2                          |
| 49 | Cell cycle_Influence of Ras and Rho proteins on G1/S Transition                                  | 4.732E-04 | Cyclin A2, SKP2, Cyclin E, CDK2, E2F1                              |
| 50 | IL-2 as a growth factor for T cells in multiple sclerosis                                        | 6.856E-04 | PCNA, Cyclin E, CDK2, E2F1                                         |



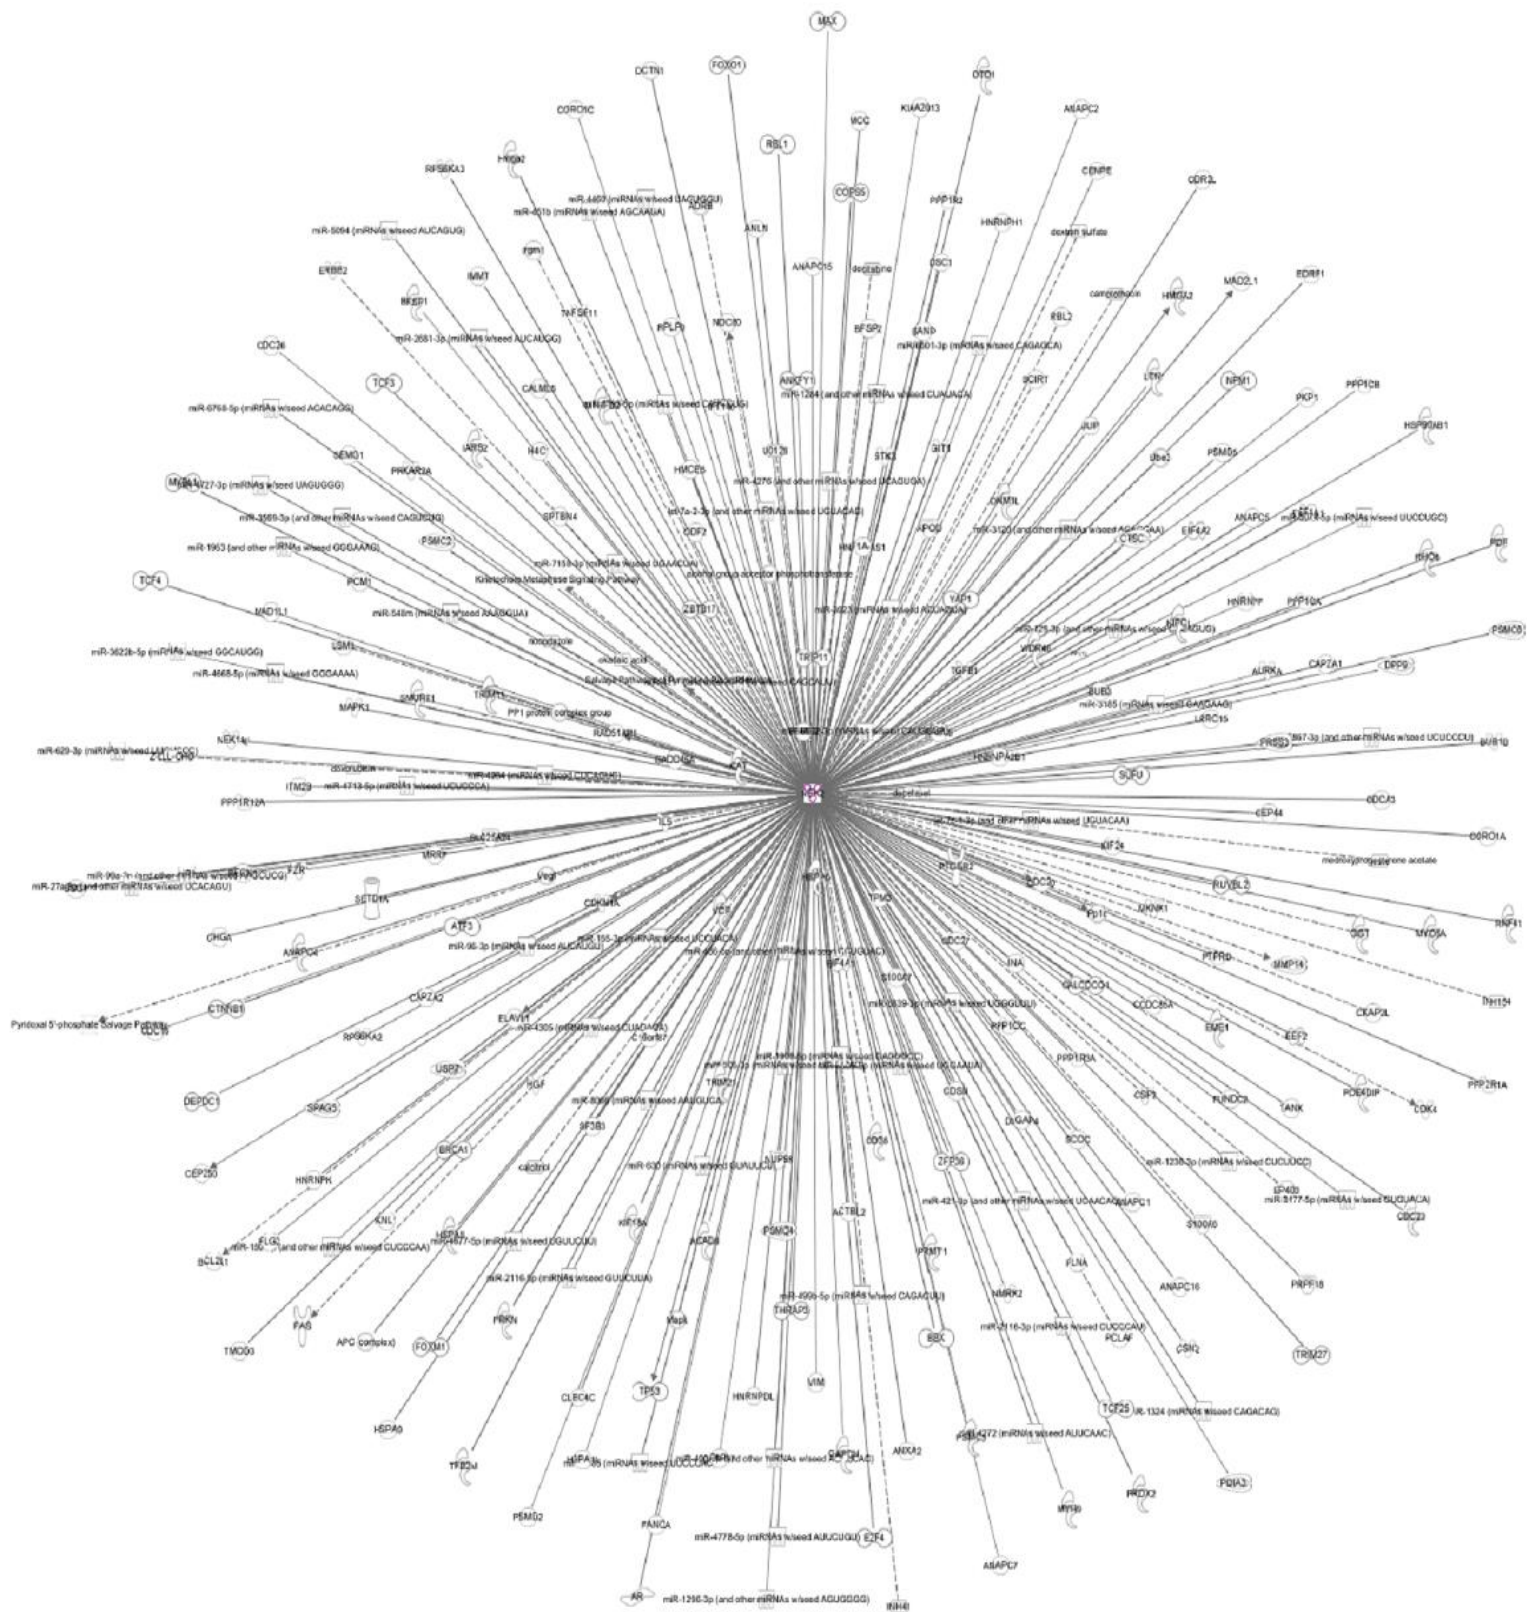

**Figure S2. Analysis of micro (mi)RNA networks with NEK2 in breast cancer.** We used the miRWalk database to identify associations with NEK2, and then network regulation was analyzed by Ingenuity Pathway Analysis (IPA). hsa-miR-1236-3p, hsa-miR-4264, hsa-miR-486-5p, hsa-miR-155-3p, and hsa-miR-6839-3p are co-expressed for breast cancer development.

**Table S4. Correlation of NEK2 expression with the level of immune infiltration of B cells in BRCA (Analysis of TIMER database).** rho shows the partial correlation value, and the level of statistical significance is shown with p-value and adjusted p-value. The threshold of significance was p-value <0.05.

| Cancer        | Infiltrates                        | rho    | p-value | Adjusted p-value |
|---------------|------------------------------------|--------|---------|------------------|
| BRCA (n=1100) | B cell memory_CIBERSORT            | -0.072 | 0.023   | 0.084            |
| BRCA (n=1100) | B cell memory_CIBERSORT-ABS        | -0.062 | 0.051   | 0.148            |
| BRCA (n=1100) | B cell memory_XCELL                | 0.045  | 0.158   | 0.333            |
| BRCA (n=1100) | B cell naive_CIBERSORT             | 0.000  | 0.992   | 0.997            |
| BRCA (n=1100) | B cell naive_CIBERSORT-ABS         | 0.049  | 0.126   | 0.288            |
| BRCA (n=1100) | B cell naive_XCELL                 | 0.109  | 0.001   | 0.005            |
| BRCA (n=1100) | B cell plasma_CIBERSORT            | -0.036 | 0.259   | 0.478            |
| BRCA (n=1100) | B cell plasma_CIBERSORT-ABS        | 0.007  | 0.814   | 0.909            |
| BRCA (n=1100) | B cell plasma_XCELL                | 0.052  | 0.100   | 0.246            |
| BRCA (n=1100) | B cell_EPIC                        | 0.019  | 0.550   | 0.750            |
| BRCA (n=1100) | B cell_MCPCOUNTER                  | 0.029  | 0.355   | 0.593            |
| BRCA (n=1100) | B cell_QUANTISEQ                   | 0.180  | 0.000   | 0.000            |
| BRCA (n=1100) | B cell_TIMER                       | 0.061  | 0.053   | 0.150            |
| BRCA (n=1100) | B cell_XCELL                       | 0.202  | 0.000   | 0.000            |
| BRCA (n=1100) | Class-switched memory B cell_XCELL | 0.101  | 0.001   | 0.011            |

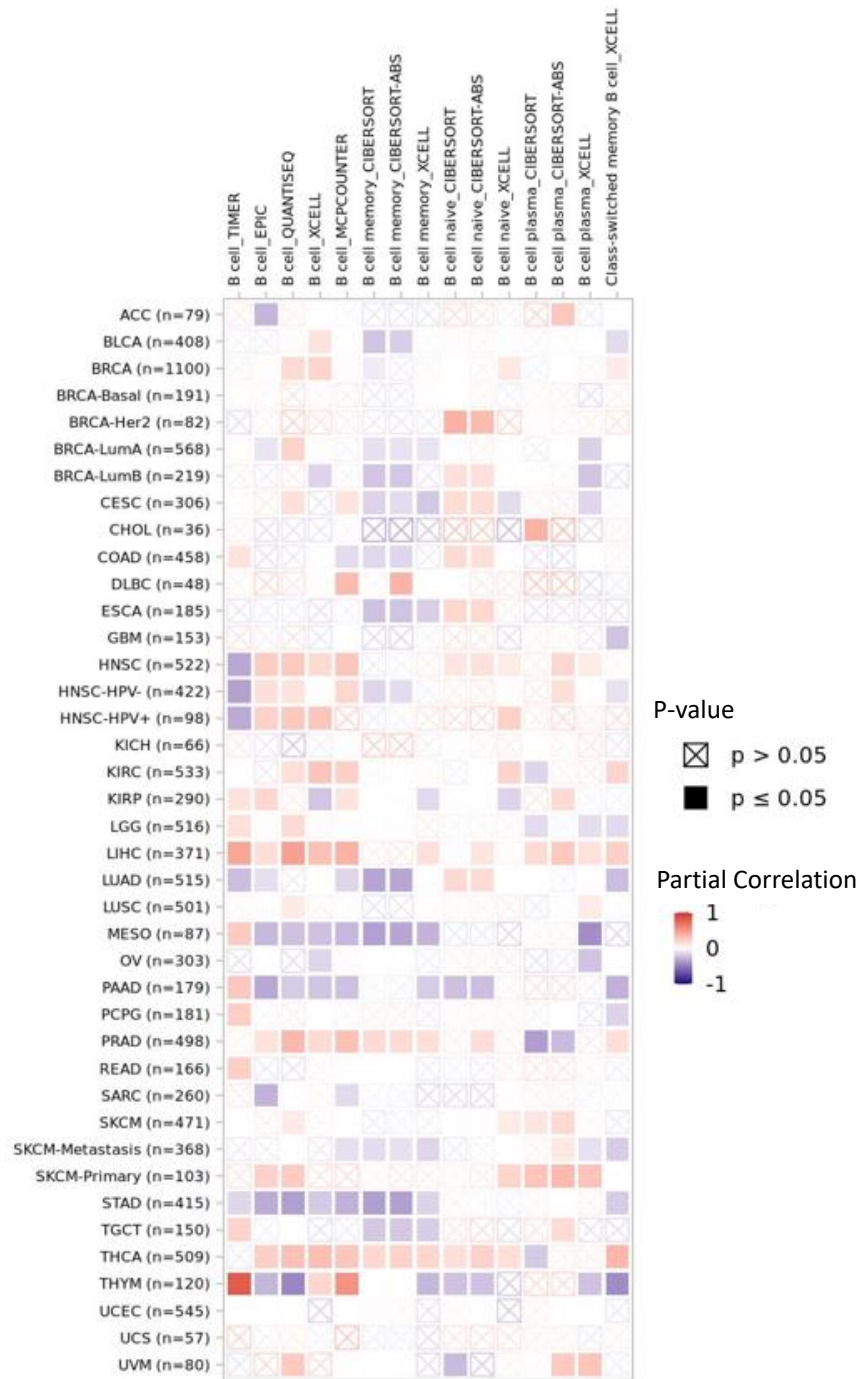

**Figure S3. Heatmap of NEK2 expression with the level of immune infiltration of B cells in different types of cancer (Analysis of TIMER database).** The partial correlation coefficient shows the size of the correlation, and the p-value indicates the level of statistical significance. The threshold of significance was p-value <0.05.

**Table S5. Correlation of NEK2 expression with the level of immune infiltration of CD4+ T Cells in BRCA (Analysis of TIMER database).** rho shows the partial correlation value, and the level of statistical significance is shown with p-value and adjusted p-value. The threshold of significance was p-value <0.05.

| <b>Cancer</b>        | <b>Infiltrates</b>                         | <b>rho</b> | <b>p-value</b> | <b>Adjusted p-value</b> |
|----------------------|--------------------------------------------|------------|----------------|-------------------------|
| <b>BRCA (n=1100)</b> | T cell CD4+ (non-regulatory)_QUANTISEQ     | -0.1357    | 0.0000         | 0.0001                  |
| <b>BRCA (n=1100)</b> | T cell CD4+ (non-regulatory)_XCELL         | 0.0401     | 0.2063         | 0.3350                  |
| <b>BRCA (n=1100)</b> | T cell CD4+ central memory_XCELL           | -0.2947    | 0.0000         | 0.0000                  |
| <b>BRCA (n=1100)</b> | T cell CD4+ effector memory_XCELL          | -0.2598    | 0.0000         | 0.0000                  |
| <b>BRCA (n=1100)</b> | T cell CD4+ memory activated_CIBERSORT     | 0.2223     | 0.0000         | 0.0000                  |
| <b>BRCA (n=1100)</b> | T cell CD4+ memory activated_CIBERSORT-ABS | 0.2224     | 0.0000         | 0.0000                  |
| <b>BRCA (n=1100)</b> | T cell CD4+ memory resting_CIBERSORT       | 0.0617     | 0.0518         | 0.1188                  |
| <b>BRCA (n=1100)</b> | T cell CD4+ memory resting_CIBERSORT-ABS   | 0.1065     | 0.0008         | 0.0031                  |
| <b>BRCA (n=1100)</b> | T cell CD4+ memory_XCELL                   | 0.2963     | 0.0000         | 0.0000                  |
| <b>BRCA (n=1100)</b> | T cell CD4+ naive_CIBERSORT                | -0.0194    | 0.5406         | 0.6575                  |
| <b>BRCA (n=1100)</b> | T cell CD4+ naive_CIBERSORT-ABS            | -0.0195    | 0.5399         | 0.6575                  |
| <b>BRCA (n=1100)</b> | T cell CD4+ naive_XCELL                    | -0.0297    | 0.3491         | 0.4943                  |
| <b>BRCA (n=1100)</b> | T cell CD4+ Th1_XCELL                      | 0.1474     | 0.0000         | 0.0000                  |
| <b>BRCA (n=1100)</b> | T cell CD4+ Th2_XCELL                      | 0.6766     | 0.0000         | 0.0000                  |
| <b>BRCA (n=1100)</b> | T cell CD4+_EPIC                           | 0.0365     | 0.2496         | 0.3903                  |
| <b>BRCA (n=1100)</b> | T cell CD4+_TIMER                          | 0.0045     | 0.8886         | 0.9314                  |

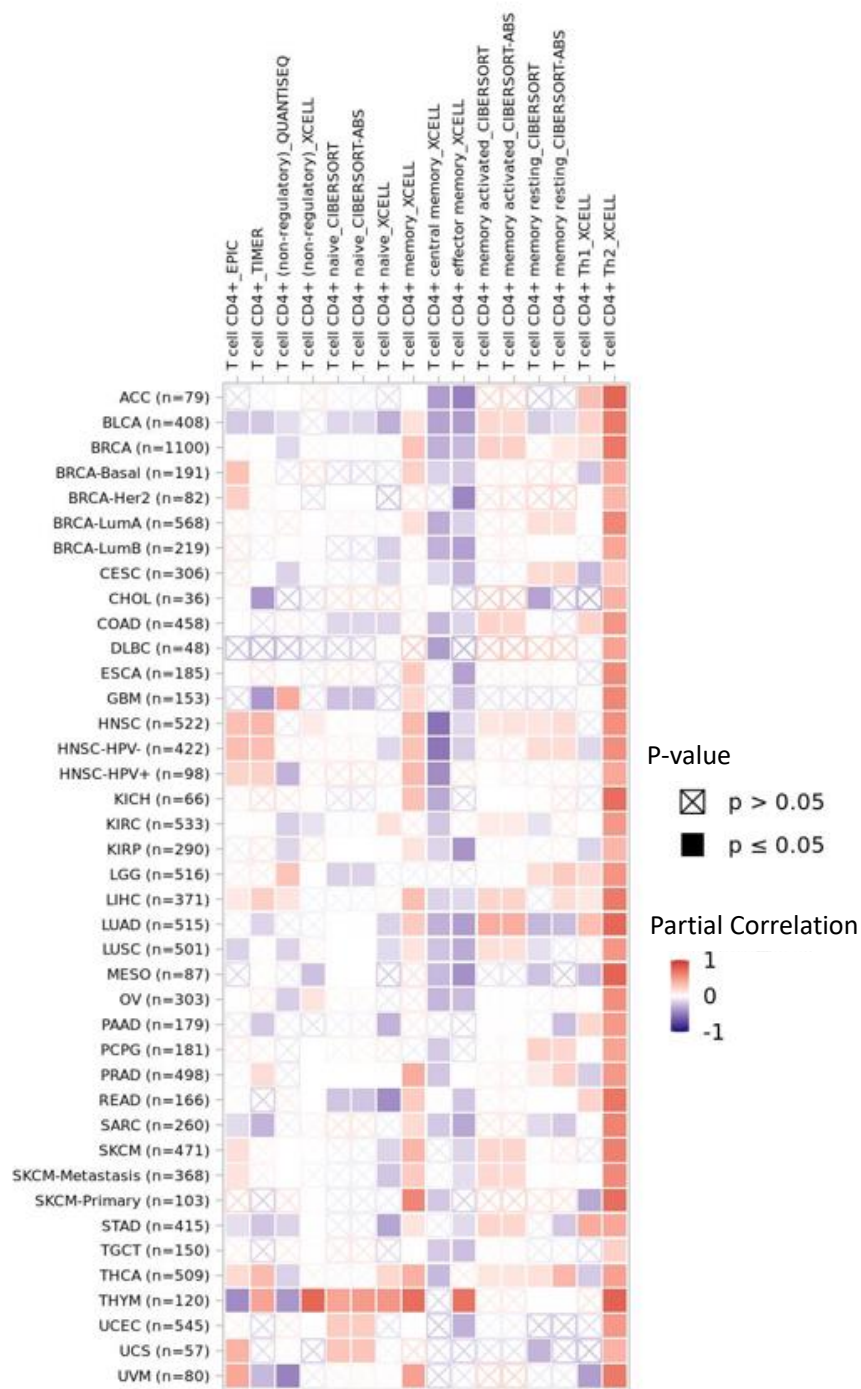

**Figure S4. Heatmap of NEK2 expression with the level of immune infiltration of CD4+ T Cells in different types of cancer (Analysis of TIMER database).** The partial correlation coefficient shows the size of the correlation, and the p-value indicates the level of statistical significance. The threshold of significance was p-value <0.05.
